# Supplementary material for: Long-Term Dietary Supplementation of Pomegranates, Figs and Dates Alleviate Neuroinflammation in a Transgenic Mouse Model of Alzheimer’s Disease
Source: PLoS One. 2015 Mar 25;10(3):e0120964. doi: 10.1371/journal.pone.0120964 (PMC4373715; doi:10.1371/journal.pone.0120964)
Supplement: S1 Dataset — (XLSX) [file pone.0120964.s001.xlsx]

## Sheet: Fig-1
			Data set Figure 1
	IL-2				Plasma			IL-3			Plasma
	Control Wild	Control Tg	Pomegranate Tg	Figs Tg	Dates Tg			Control Wild	Control Tg	Pomegranate Tg	Figs Tg	Dates Tg
	35	64	41	47	52			66	145	86	101	121
	32.2	58.88	37.72	43.24	47.84			60.72	133.4	79.12	92.92	111.32
	37.8	69.248	44.28	50.76	56.16			71.28	156.89	92.88	109.08	130.68
	38.15	69.76	44.69	51.277	56.732			71.94	158.05	93.74	110.191	132.011
	31.85	58.24	37.31	42.77	47.32			60.06	131.95	78.26	91.91	110.11
	35.035	64.064	41.041	47.047	52.052			66.066	145.145	86.086	101.101	121.121
Average	35.0058	64.032	41.0068	47.0157	52.0173		Average	66.011	145.072	86.0143	101.034	121.04
SD	2.66556	4.90121	3.12251	3.59059	3.97256		SD	5.02648	11.1043	6.54966	7.71594	9.24385
p values		1.85189e-06	7.01741e-06	6.75673e-05	0.000993425		p values		9.94201e-07	3.22178e-06	2.39211e-05	0.00238951
	IL-4			Plasma				IL-5			Plasma
	Control Wild	Control Tg	Pomegranate Tg	Figs Tg	Dates Tg			Control Wild	Control Tg	Pomegranate Tg	Figs Tg	Dates Tg
	32	82	58	64	70			81	172	118	131	144
	29.44	75.44	53.36	58.88	64.4			74.52	158.24	108.56	120.52	132.48
	34.56	88.56	62.64	69.12	75.6			87.48	186.104	127.44	141.48	155.52
	34.88	89.38	63.22	69.76	76.3			88.29	187.48	128.62	142.921	157.104
	29.12	74.62	52.78	58.24	63.7			73.71	156.52	107.38	119.21	131.04
	32.032	82.082	58.058	64.064	70.07			81.081	172.172	118.118	131.131	144.144
Average	32.0053	82.0137	58.0097	64.0107	70.0117		Average	81.0135	172.086	118.02	131.044	144.048
SD	2.22474	5.7009	4.03234	4.44948	4.86662		SD	5.63138	12.0243	8.20373	9.13583	10.0424
p values		7.99724e-07	3.03882e-05	0.000293527	0.0052052		p values		1.06577e-06	1.84747e-05	0.000158952	0.00267239
	IL-9			Plasma				IL-10			Plasma
	Control Wild	Control Tg	Pomegranate Tg	Figs Tg	Dates Tg			Control Wild	Control Tg	Pomegranate Tg	Figs Tg	Dates Tg
	63	165	102	121	141			108	202	125	141	165
	57.96	151.8	93.84	111.32	129.72			99.36	185.84	115	129.72	151.8
	68.04	178.53	110.16	130.68	152.28			116.64	218.564	135	152.28	178.2
	68.67	179.85	111.18	132.011	153.831			117.72	220.18	136.25	153.831	180.015
	57.33	150.15	92.82	110.11	128.31			98.28	183.82	113.75	128.31	150.15
	63.063	165.165	102.102	121.121	141.141			108.108	202.202	125.125	141.141	165.165
Average	63.0105	165.083	102.017	121.04	141.047		Average	108.018	202.101	125.021	141.047	165.055
SD	4.37996	11.535	7.09136	8.43844	9.83323		SD	7.5085	14.1216	8.6904	9.83323	11.507
p values		8.33462e-07	4.72305e-06	6.55109e-05	0.00551303		p values		1.6482e-06	4.77246e-06	2.48256e-05	0.00117665
	Eotaxin			Plasma
	Control Wild	Control Tg	Pomegranate Tg	Figs Tg	Dates Tg
	80	170	104	123	143
	73.6	156.4	95.68	113.16	131.56
	86.4	183.94	112.32	132.84	154.44
	87.2	185.3	113.36	134.193	156.013
	72.8	154.7	94.64	111.93	130.13
	80.08	170.17	104.104	123.123	143.143
Average	80.0133	170.085	104.017	123.041	143.048
SD	5.56185	11.8845	7.23041	8.57792	9.97271
p values		1.06401e-06	4.2576e-06	4.92927e-05	0.00314817
				IL-2	IL-3	IL-4	IL-5	IL-9	IL-10	Eotaxin
			Control WT	35.0058	66.011	32.0053	81.0135	63.0105	108.018	80.0133
			Control TG	64.032	145.072	82.0137	172.086	165.083	202.101	170.085
			Pomegranates	41.0068	86.0143	58.0097	118.02	102.017	125.021	104.017
			Figs	47.0157	101.034	64.0107	131.044	121.04	141.047	123.041
			Dates	52.0173	121.04	70.0117	144.048	141.047	165.055	143.048
				2.66556	5.02648	2.22474	5.63138	4.37996	7.5085	5.56185
				4.90121	11.1043	5.7009	12.0243	11.535	14.1216	11.8845
				3.12251	6.54966	4.03234	8.20373	7.09136	8.6904	7.23041
				3.59059	7.71594	4.44948	9.13583	8.43844	9.83323	8.57792
				3.97256	9.24385	4.86662	10.0424	9.83323	11.507	9.97271
